# Supplementary material
Source: PubMed Central journal article supplement (PMC5886375)
Supplement: NIHMS941738-supplement-9.pdf [file NIHMS941738-supplement-9.pdf]

**Table S2. List of homozygous rare nonsynonymous variations in the two pairs of patients from kindred A and B, Related to Figure 1.**

| Patients                  | Chr      | Pos         | ID          | Ref          | Alt            | Type             | Gene        | AACChange            | 1000Genomes<br>_Freq | ExAC_F<br>req | CADD_<br>Phred | CADD_<br>MSC | GDI  |
|---------------------------|----------|-------------|-------------|--------------|----------------|------------------|-------------|----------------------|----------------------|---------------|----------------|--------------|------|
| Common<br>to<br>P1 and P2 | 3        | 137890519   |             | A            | G              | Missense         | DBR1        | p.Ile120Thr          |                      |               | 27.3           | 4.75         | 2.47 |
|                           | 3        | 142402975   | rs148154571 | T            | C              | Missense         | PLS1        | p.Val236Ala          | 0.0026               | 0.0028        | 23.4           | 1.25         | 4.39 |
|                           | 11       | 6411935     | rs558809956 | TGCTGGC      | T              | Indel-in-frame   | SMPD1       | p.Leu47_Ala48del     |                      |               | 12.7           | 2.9          | 7.42 |
|                           | 11       | 125830970   | rs684535    | A            | T              | Missense         | CDON        | p.Ile1244Asn         |                      |               | 1.592          | 9.05         | 8.65 |
| Common<br>to<br>P5 and P6 | 3        | 42251577    |             | CGGA         | C              | Indel-in-frame   | TRAK1       | p.Glu640del          |                      |               | 16.05          | 2.31         | 3.44 |
|                           | 3        | 46751073    | rs71619660  | TAAG         | T              | Indel-in-frame   | TMIE        | p.Lys131del          |                      |               | 13.71          | 25.6         | 0.96 |
|                           | 3        | 113376110   | rs59601191  | TTGCTGCTGC   | T              | Indel-in-frame   | KIAA2018    | p.Gln1471_Gln1473del |                      |               | 19.01          | 2.31         | 8.22 |
|                           | 3        | 136047691   | rs142403318 | C            | T              | Missense         | PCCB        | p.Ala497Val          | 0.001                | 0.002         | 34             | 0.06         | 2.61 |
|                           | 3        | 137893589   |             | A            | G              | Missense         | DBR1        | p.Tyr17His           |                      |               | 25.4           | 4.75         | 2.47 |
|                           | 3        | 184429133   | rs397720350 | A            | ATCC           | Indel-in-frame   | MAGEF1      | p.Glu158dup          |                      |               | 4.953          | 2.31         | 9.13 |
|                           | 4        | 140811085   | rs58287721  | TGCTGCTGCTGC | T              | Indel-frameshift | MAML3       | p.Gln498fs           | 0.0092               |               | 28.1           | 2.31         | 6.56 |
|                           | 4        | 143003205   |             | C            | T              | Missense         | INPP4B      | p.Arg874Gln          |                      | 0             | 25.6           | 2.31         | 2.17 |
|                           | 4        | 147560457   | rs5862765   | T            | TGGC           | Indel-in-frame   | POU4F2      | p.Gly67dup           |                      |               | 2.45           | 5.6          | 6.04 |
|                           | 4        | 154477046   | rs139597924 | C            | T              | Missense         | KIAA0922    | p.Pro139Leu          | 0.0012               | 0.0011        | 26.2           | 2.31         | 8.61 |
|                           | 4        | 164246489   | rs5578      | T            | G              | Missense         | NPY1R       | p.Lys374Thr          | 0.003                | 0.0047        | 15.51          | 4.8          | 0.94 |
|                           | 4        | 164394697   | rs551489665 | GGTCT        | G              | Indel-frameshift | TKTL2       | p.Thr62fs            | 0.0016               | 0.0022        | 23.4           | 2.31         | 4.39 |
|                           | 6        | 16327864    |             | G            | GTGC           | Indel-in-frame   | ATXN1       | p.Gln225dup          |                      |               | 0.013          | 2.31         | 3.77 |
|                           | 6        | 161519350   | rs5881391   | CCTG         | C              | Indel-in-frame   | MAP3K4      | p.Ala1199del         |                      |               | 18.68          | 2.31         | 4.58 |
|                           | 7        | 131241029   | rs532078953 | GGGCGAC      | G              | Indel-in-frame   | PODXL       | p.Ser29_Pro30del     |                      |               | 7.336          | 2.31         | 3.35 |
|                           | 12       | 76424937    | rs71716769  | TTGC         | T              | Indel-in-frame   | PHLDA1      | p.Gln195del          | 0.0094               |               | 0.372          | 4.75         | 5.29 |
|                           | 16       | 58577315    | rs5817153   | GA           | G              | Indel-frameshift | CNOT1       | p.Phe1543fs          |                      |               | 0.483          | 2.31         | 2.12 |
|                           | 17       | 17039561    | rs3833098   | CCAG         | C              | Indel-in-frame   | MPRIIP      | p.Ser189del          |                      |               | 17.36          | 3.14         |      |
|                           | 17       | 17697101    | rs34083643  | AG           | A              | Indel-frameshift | RAI1        | p.Gln280fs           |                      |               | 23.1           | 0            | 3.23 |
|                           | 18       | 30352057    | rs200605696 | GCGCCGGCC    | G              | Indel-frameshift | AC012123.1  | p.Pro125fs           |                      |               | 25.5           | 6.71         | 2.13 |
| 19                        | 30500118 | rs556897562 | GTGA        | G            | Indel-in-frame | URI1             | p.Asp307del |                      |                      | 10.73         | 2.31           | 2.92         |      |

Note: All nonsynonymous or essential-splicing variants revealed by whole-exome sequencing, with a MAF<0.01 in ExAC, in genes with a gene damage index (GDI) below 13.35564 (95% true positive confidence interval GDI cutoff for autosomal recessive mode primary immune deficiency gene prediction), either common to P1 and P2 from kindred A, or common to P5 and P6 in kindred B, are listed in this table.
