# Supplementary material
Source: PubMed Central journal article supplement (PMC5886375)
Supplement: NIHMS941738-supplement-10.pdf [file NIHMS941738-supplement-10.pdf]

**Table S3. List of nonsynonymous *DBR1* variants for which homozygous carriers have been reported in the GnomAD database, Related to Figure 1.**

| Position       | RSID        | Reference | Alternative | Protein consequence | Number of homozygotes | Allele frequency | CADD RawScore | CADD PHRED | PolyPhenCat       | PolyPhenVal | SIFTcat     | SIFTval |
|----------------|-------------|-----------|-------------|---------------------|-----------------------|------------------|---------------|------------|-------------------|-------------|-------------|---------|
| Chr3:137881084 | rs36061810  | C         | G           | p.Glu428Gln         | 25                    | 0.008266         | 4.896726      | 24.9       | Probably_damaging | 0.968       | Tolerated   | 0.06    |
| Chr3:137881029 | rs34889464  | C         | T           | p.Gly446Asp         | 5                     | 0.00284          | 1.541015      | 13.53      | Benign            | 0.013       | Tolerated   | 0.28    |
| Chr3:137881275 | rs117574050 | T         | C           | p.Asn364Ser         | 17                    | 0.002757         | -0.159478     | 1.328      | Benign            | 0.314       | Tolerated   | 0.06    |
| Chr3:137881014 | rs114451412 | G         | A           | p.Ser451Leu         | 3                     | 0.001999         | 2.993518      | 22.2       | Benign            | 0.006       | Tolerated   | 0.07    |
| Chr3:137890531 | rs191578745 | C         | T           | p.Arg116Gln         | 2                     | 0.001144         | 3.323458      | 22.9       | Benign            | 0.067       | Tolerated   | 0.35    |
| Chr3:137881320 | rs146690949 | T         | C           | p.Asp349Gly         | 1                     | 0.0003935        | 5.589105      | 26.5       | Possibly_damaging | 0.462       | Deleterious | 0.02    |
