# Supplementary material
Source: PubMed Central journal article supplement (PMC5886375)

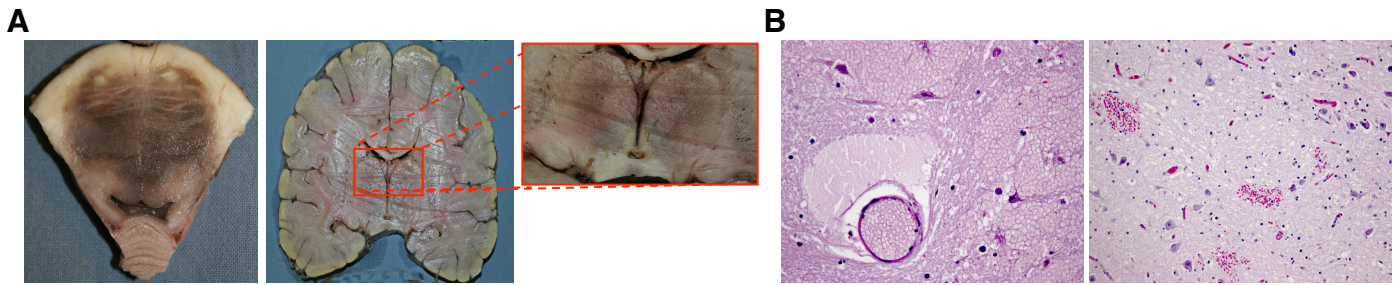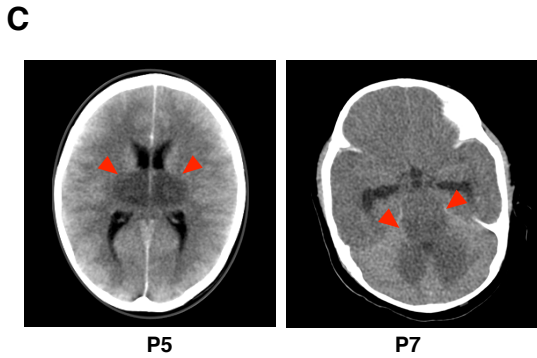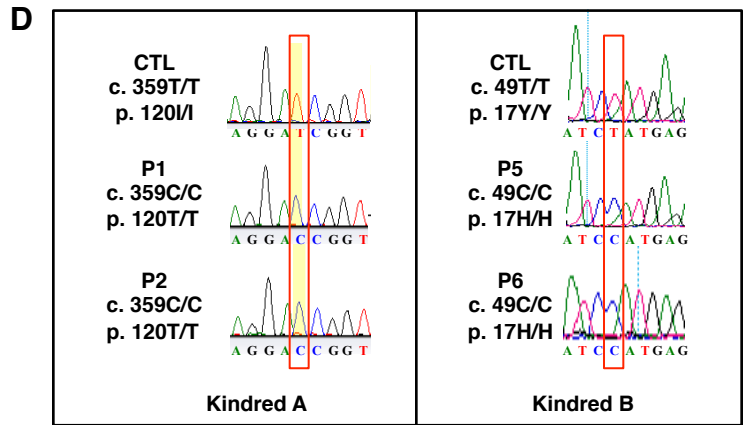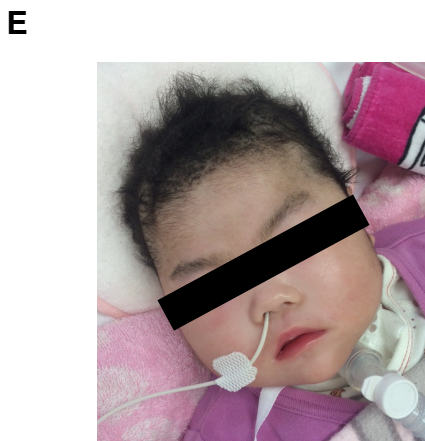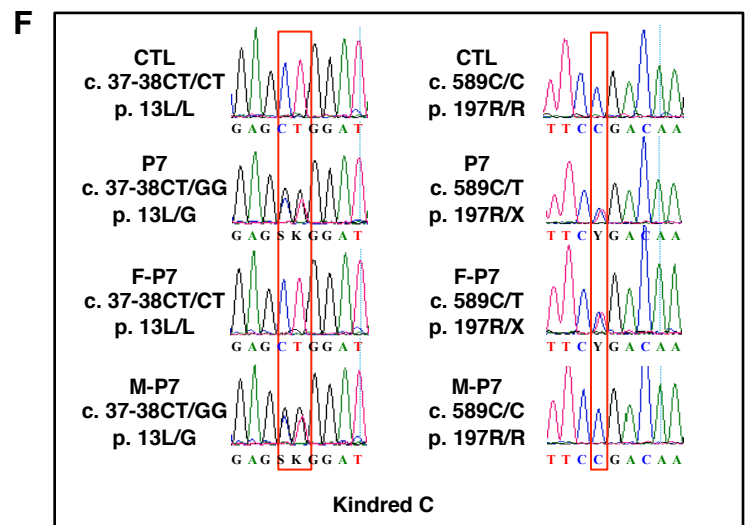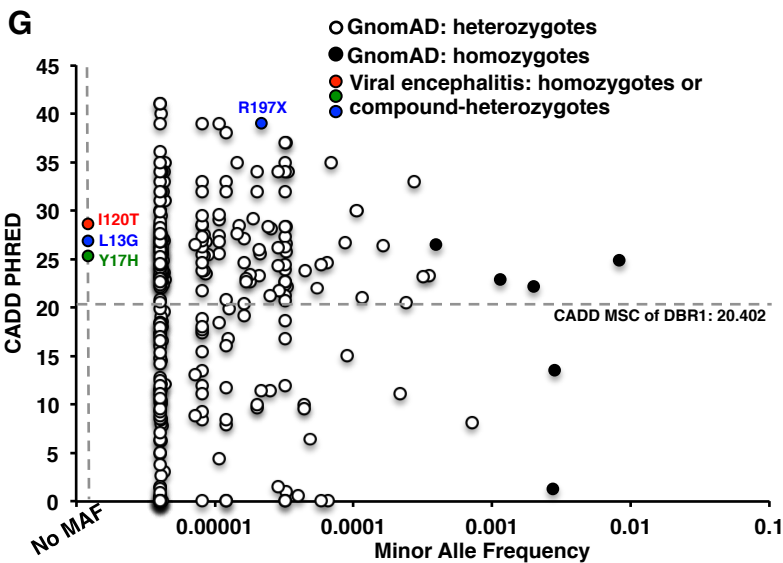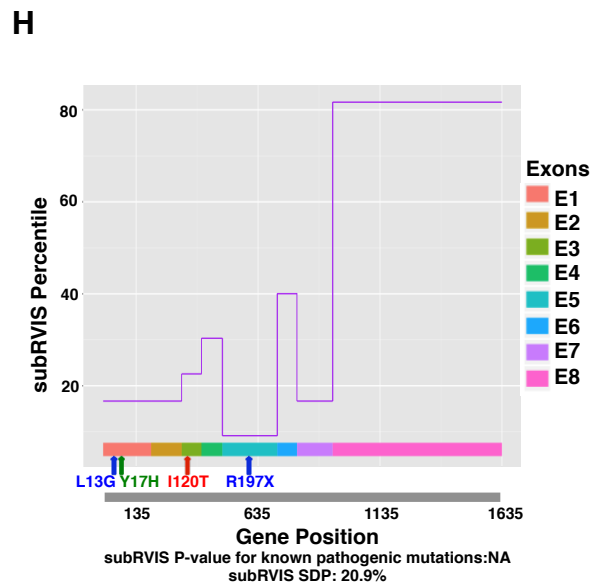

Supplement: NIHMS941738-supplement-2.pdf [file NIHMS941738-supplement-2.pdf]

Figure S2

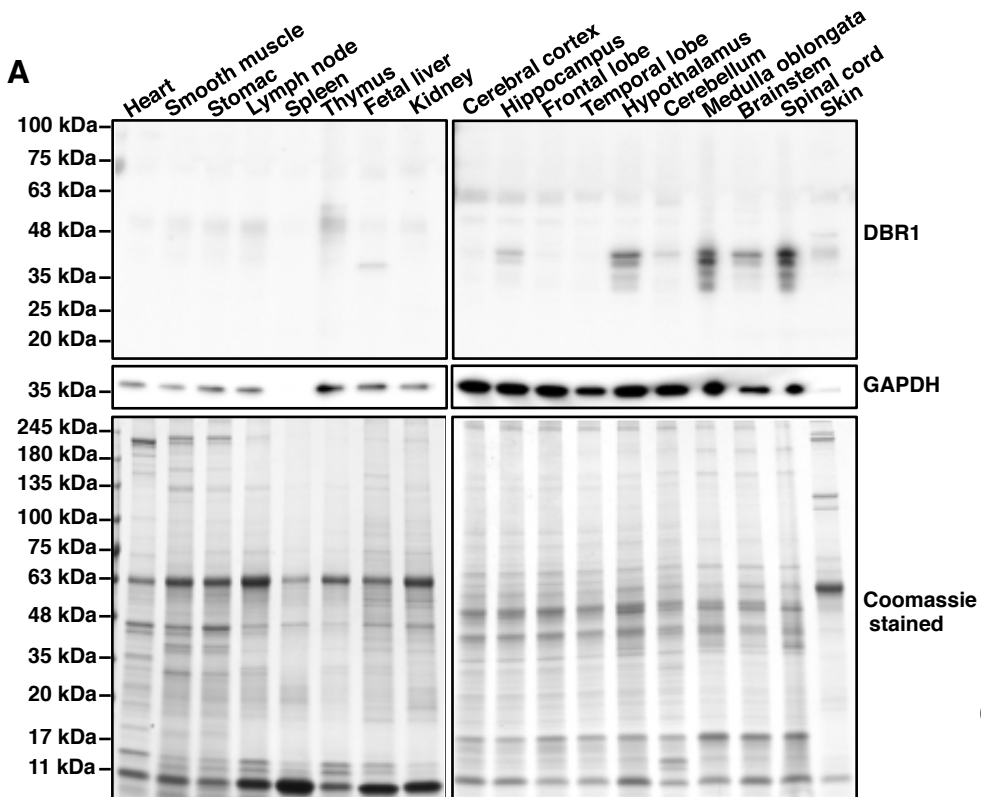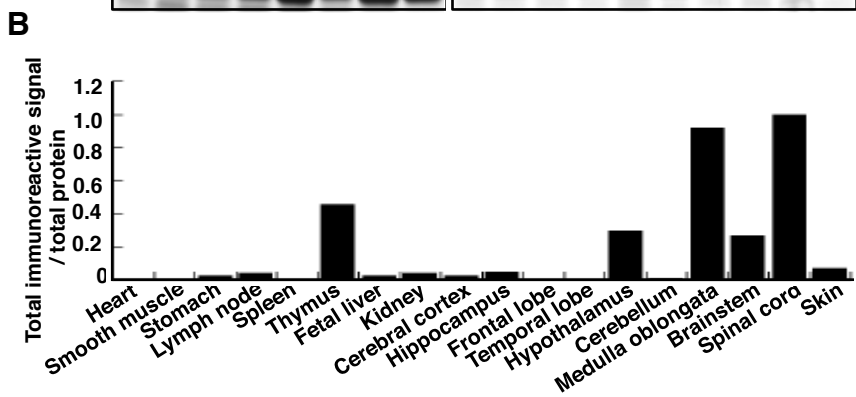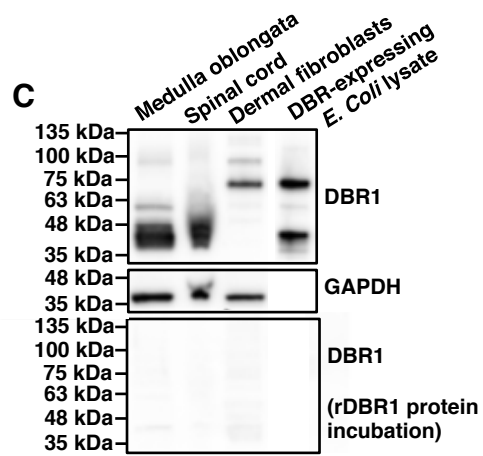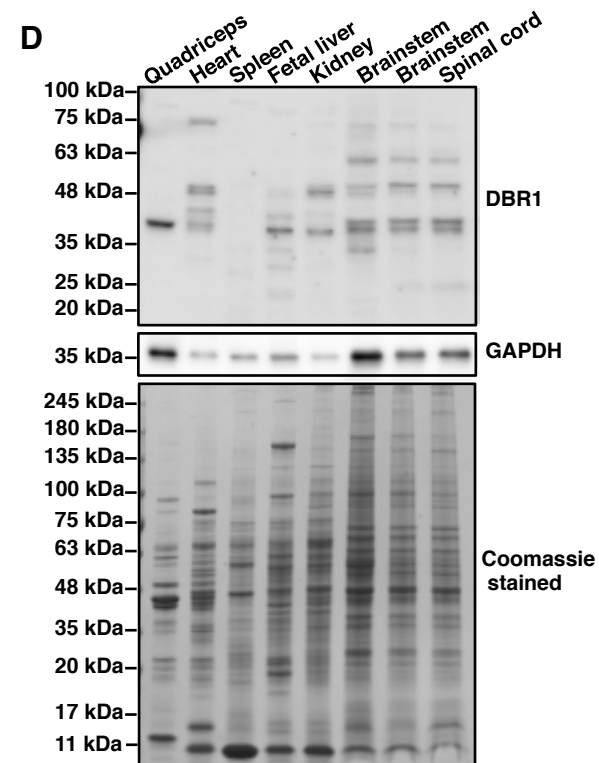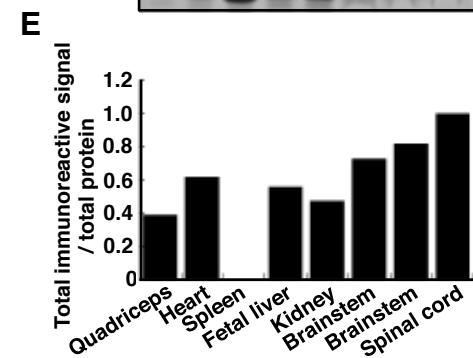

Supplement: NIHMS941738-supplement-3.pdf [file NIHMS941738-supplement-3.pdf]

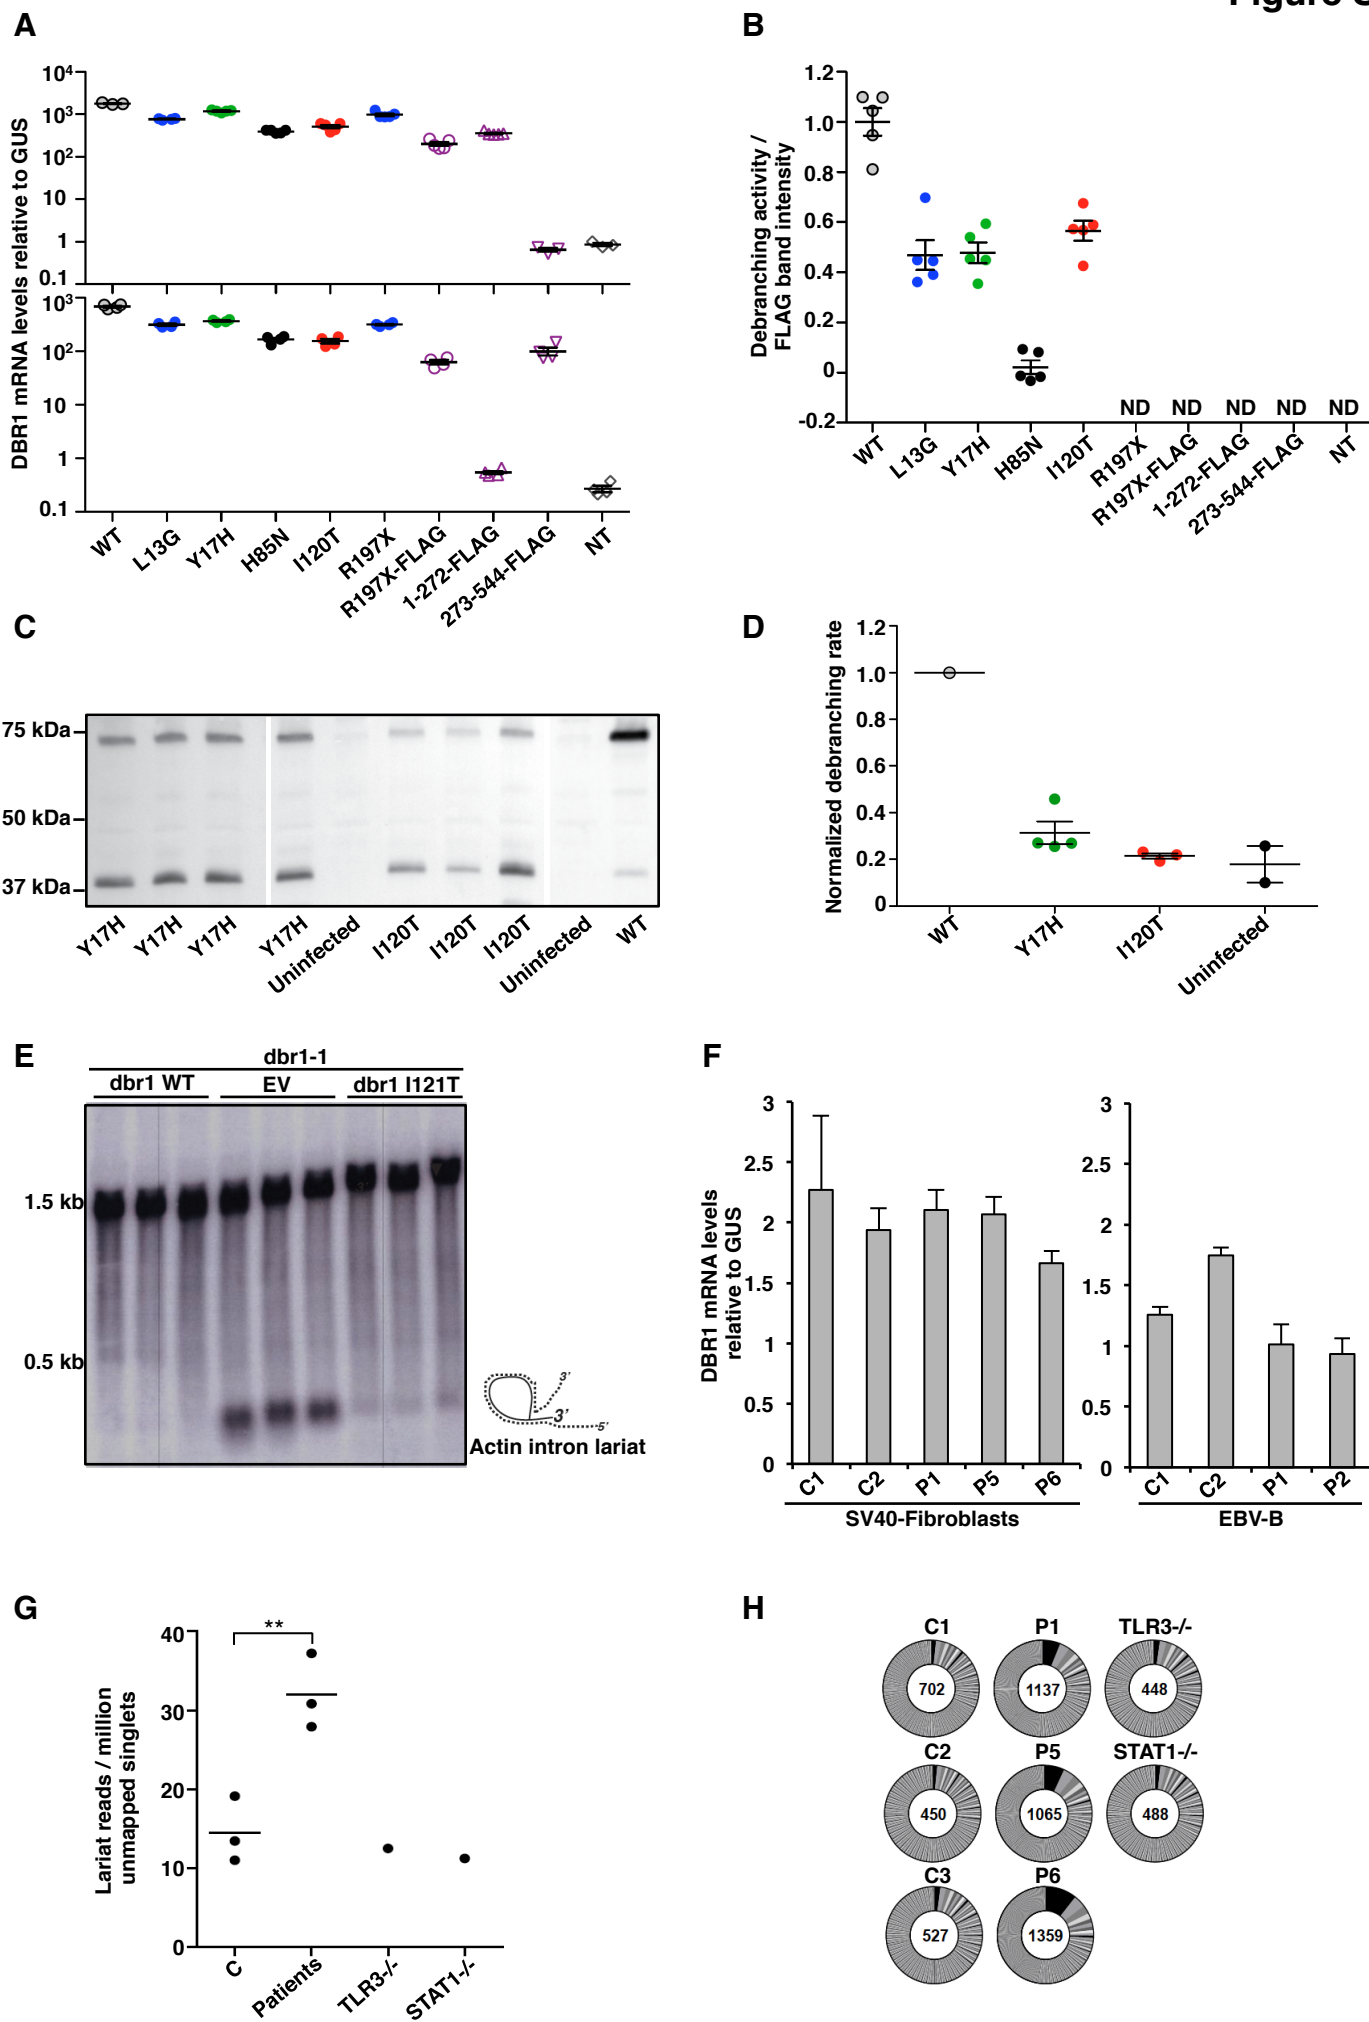

Supplement: NIHMS941738-supplement-4.pdf [file NIHMS941738-supplement-4.pdf]

Figure S4

A

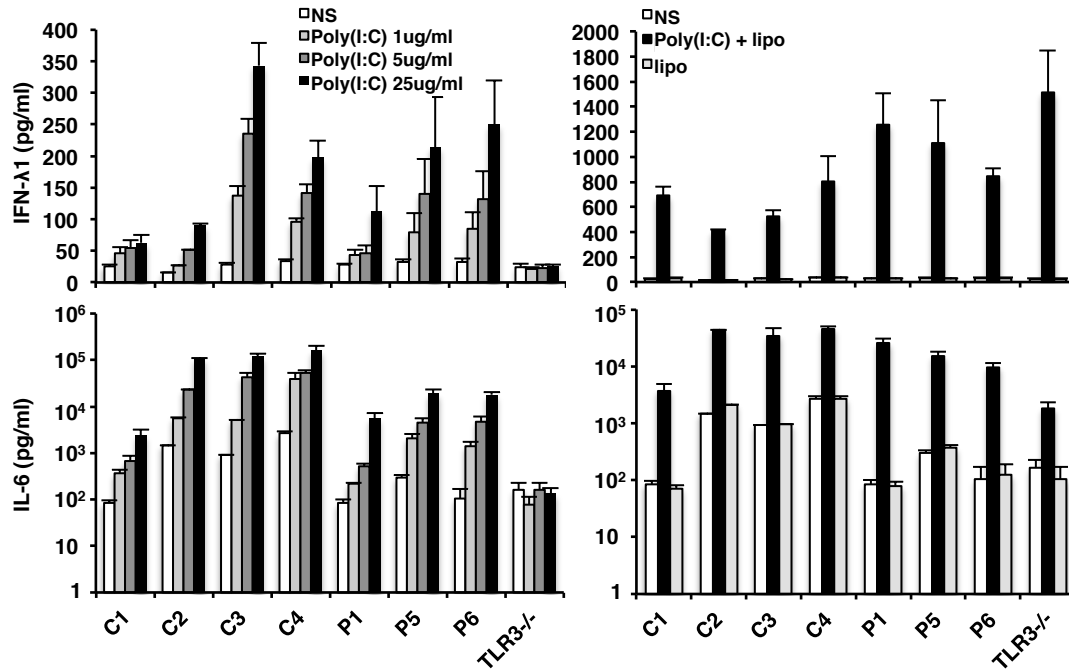

B

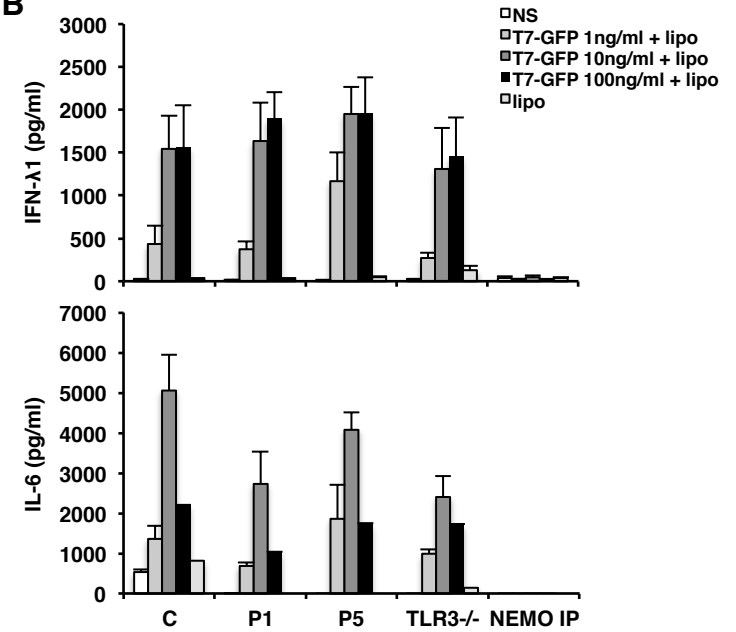

C

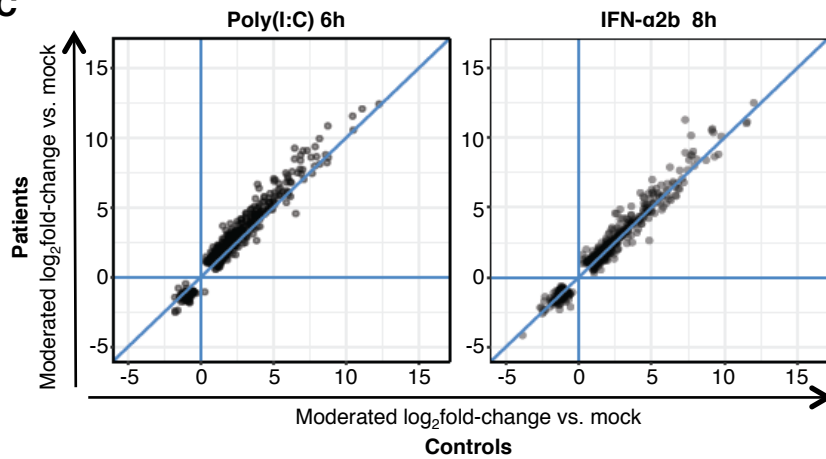

D

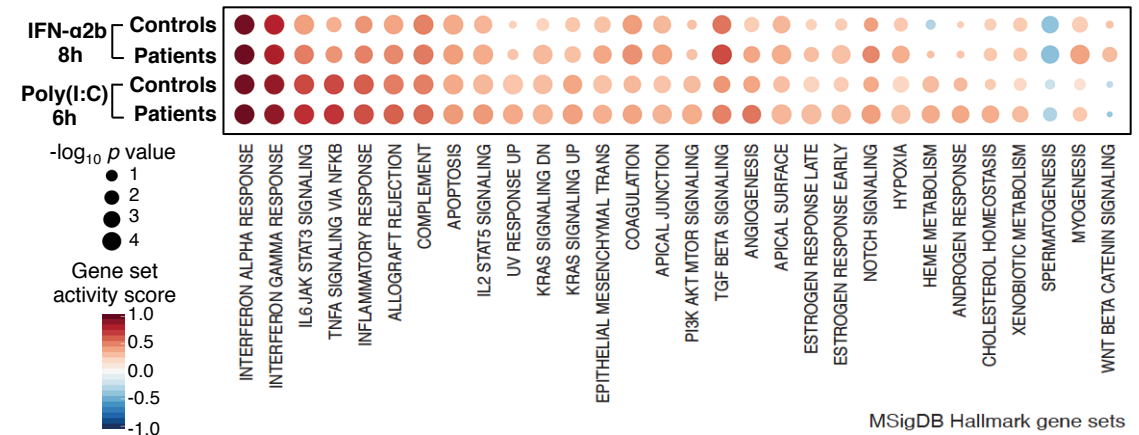

Supplement: NIHMS941738-supplement-5.pdf [file NIHMS941738-supplement-5.pdf]

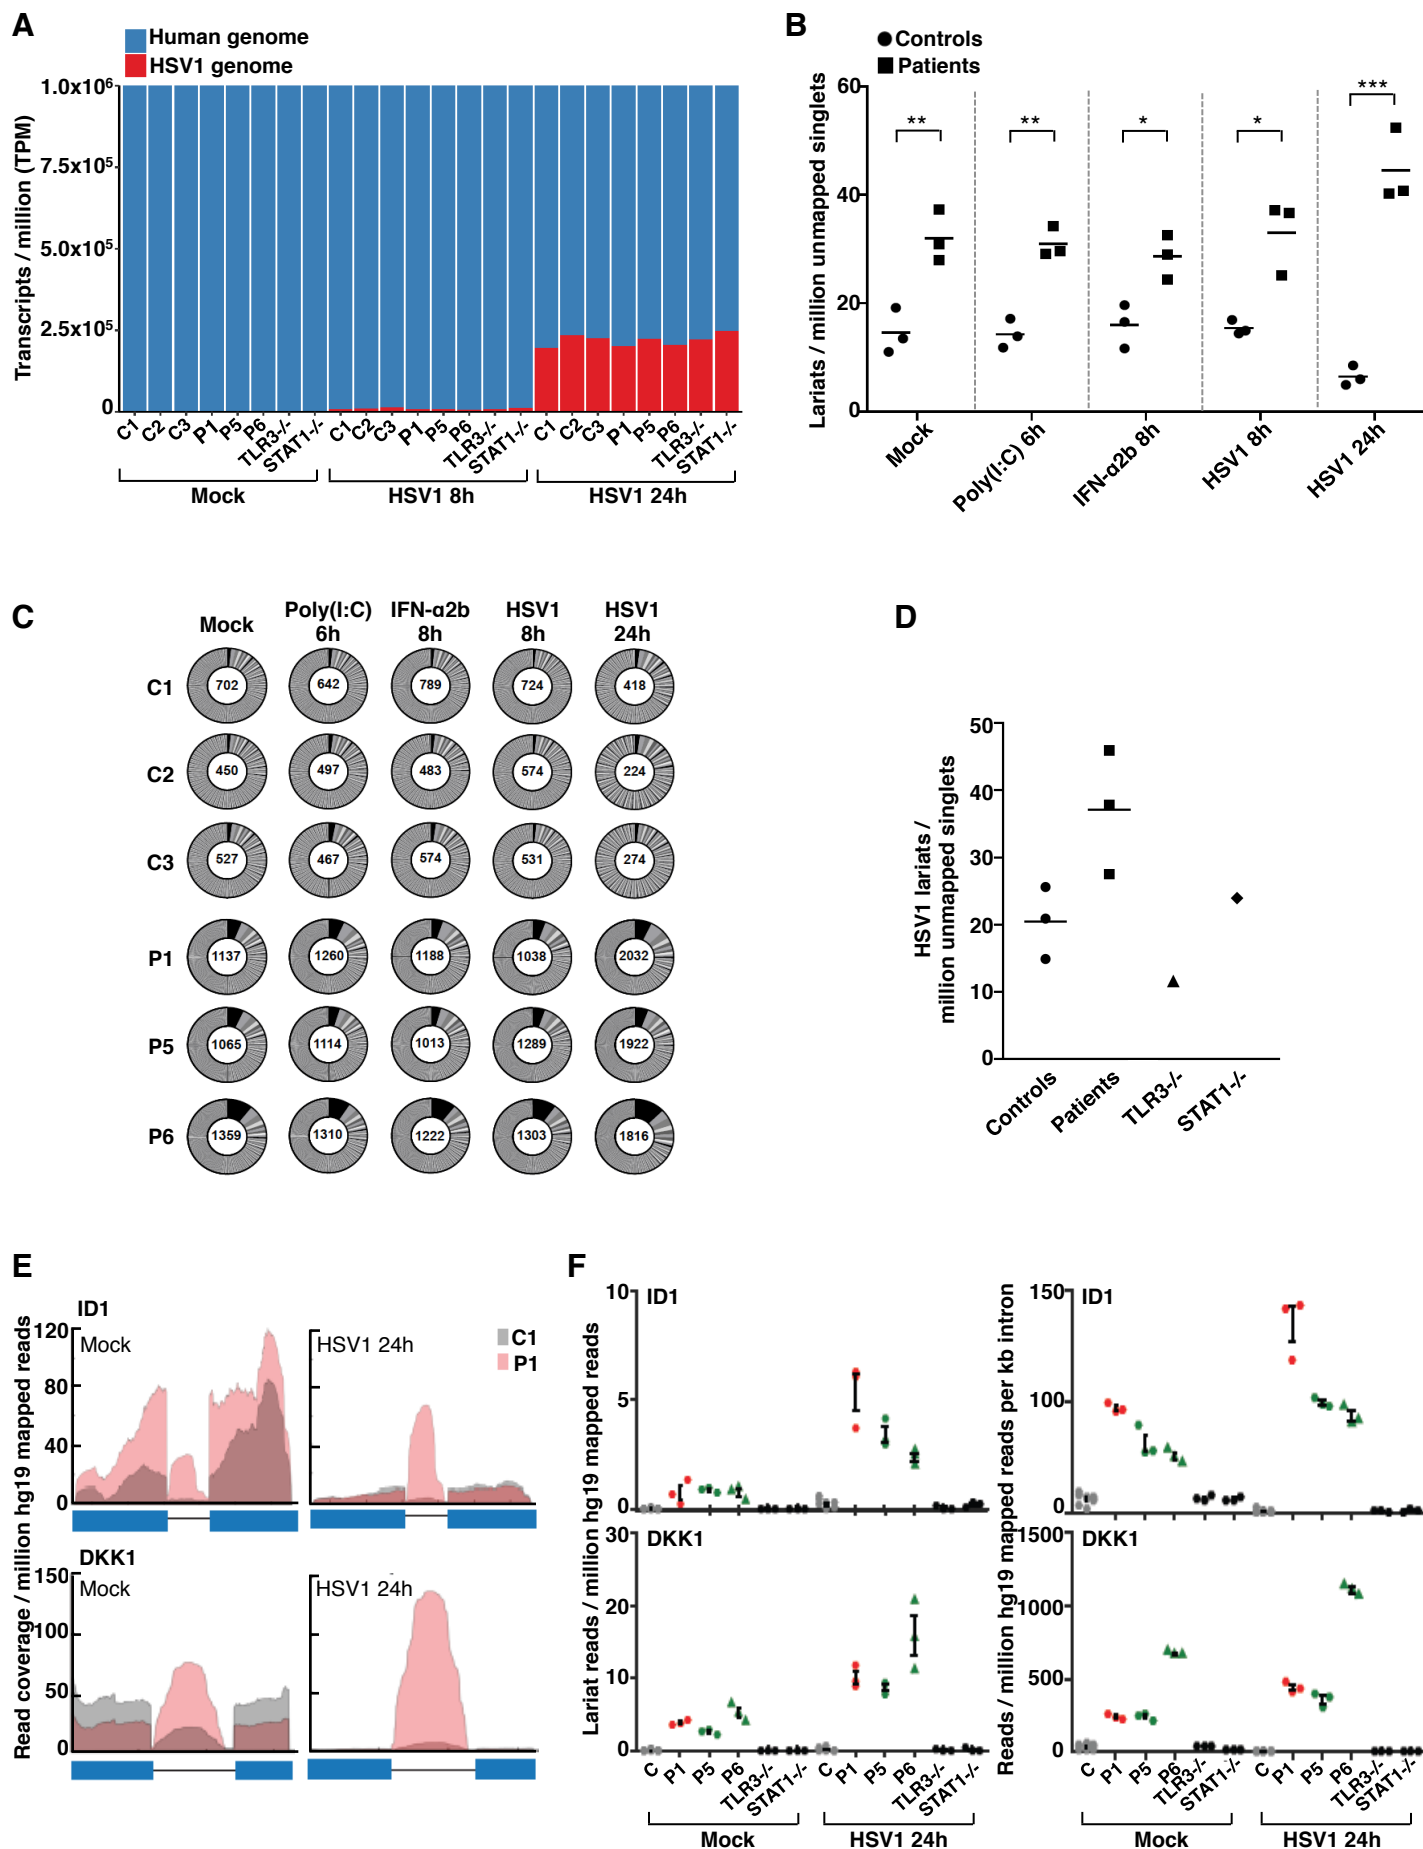

Supplement: NIHMS941738-supplement-6.pdf [file NIHMS941738-supplement-6.pdf]

Figure S6

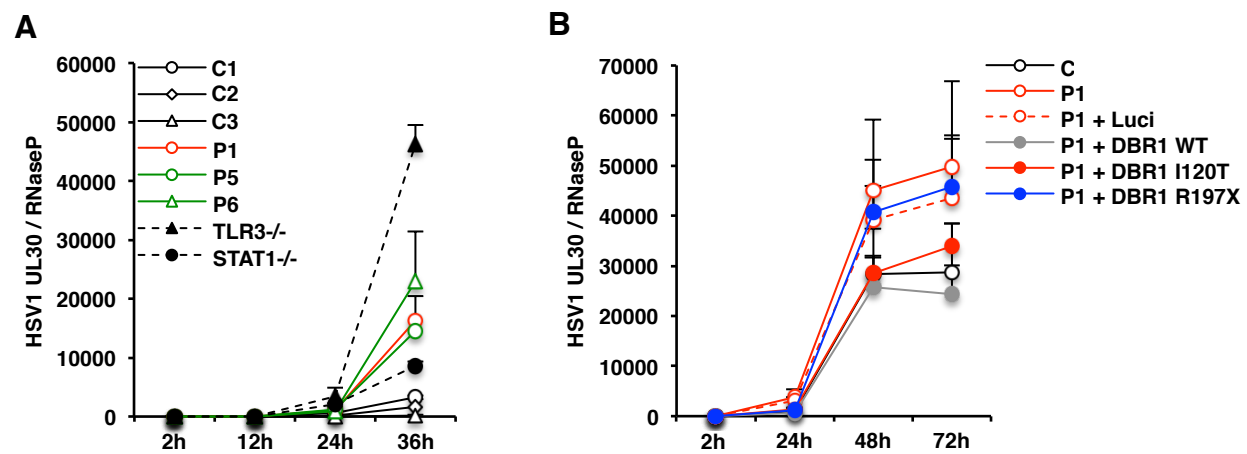

Supplement: NIHMS941738-supplement-7.pdf [file NIHMS941738-supplement-7.pdf]
